# Supplementary material
Source: PubMed Central journal article supplement (PMC3652616)

# Figure S2

## Cell cycle regulators

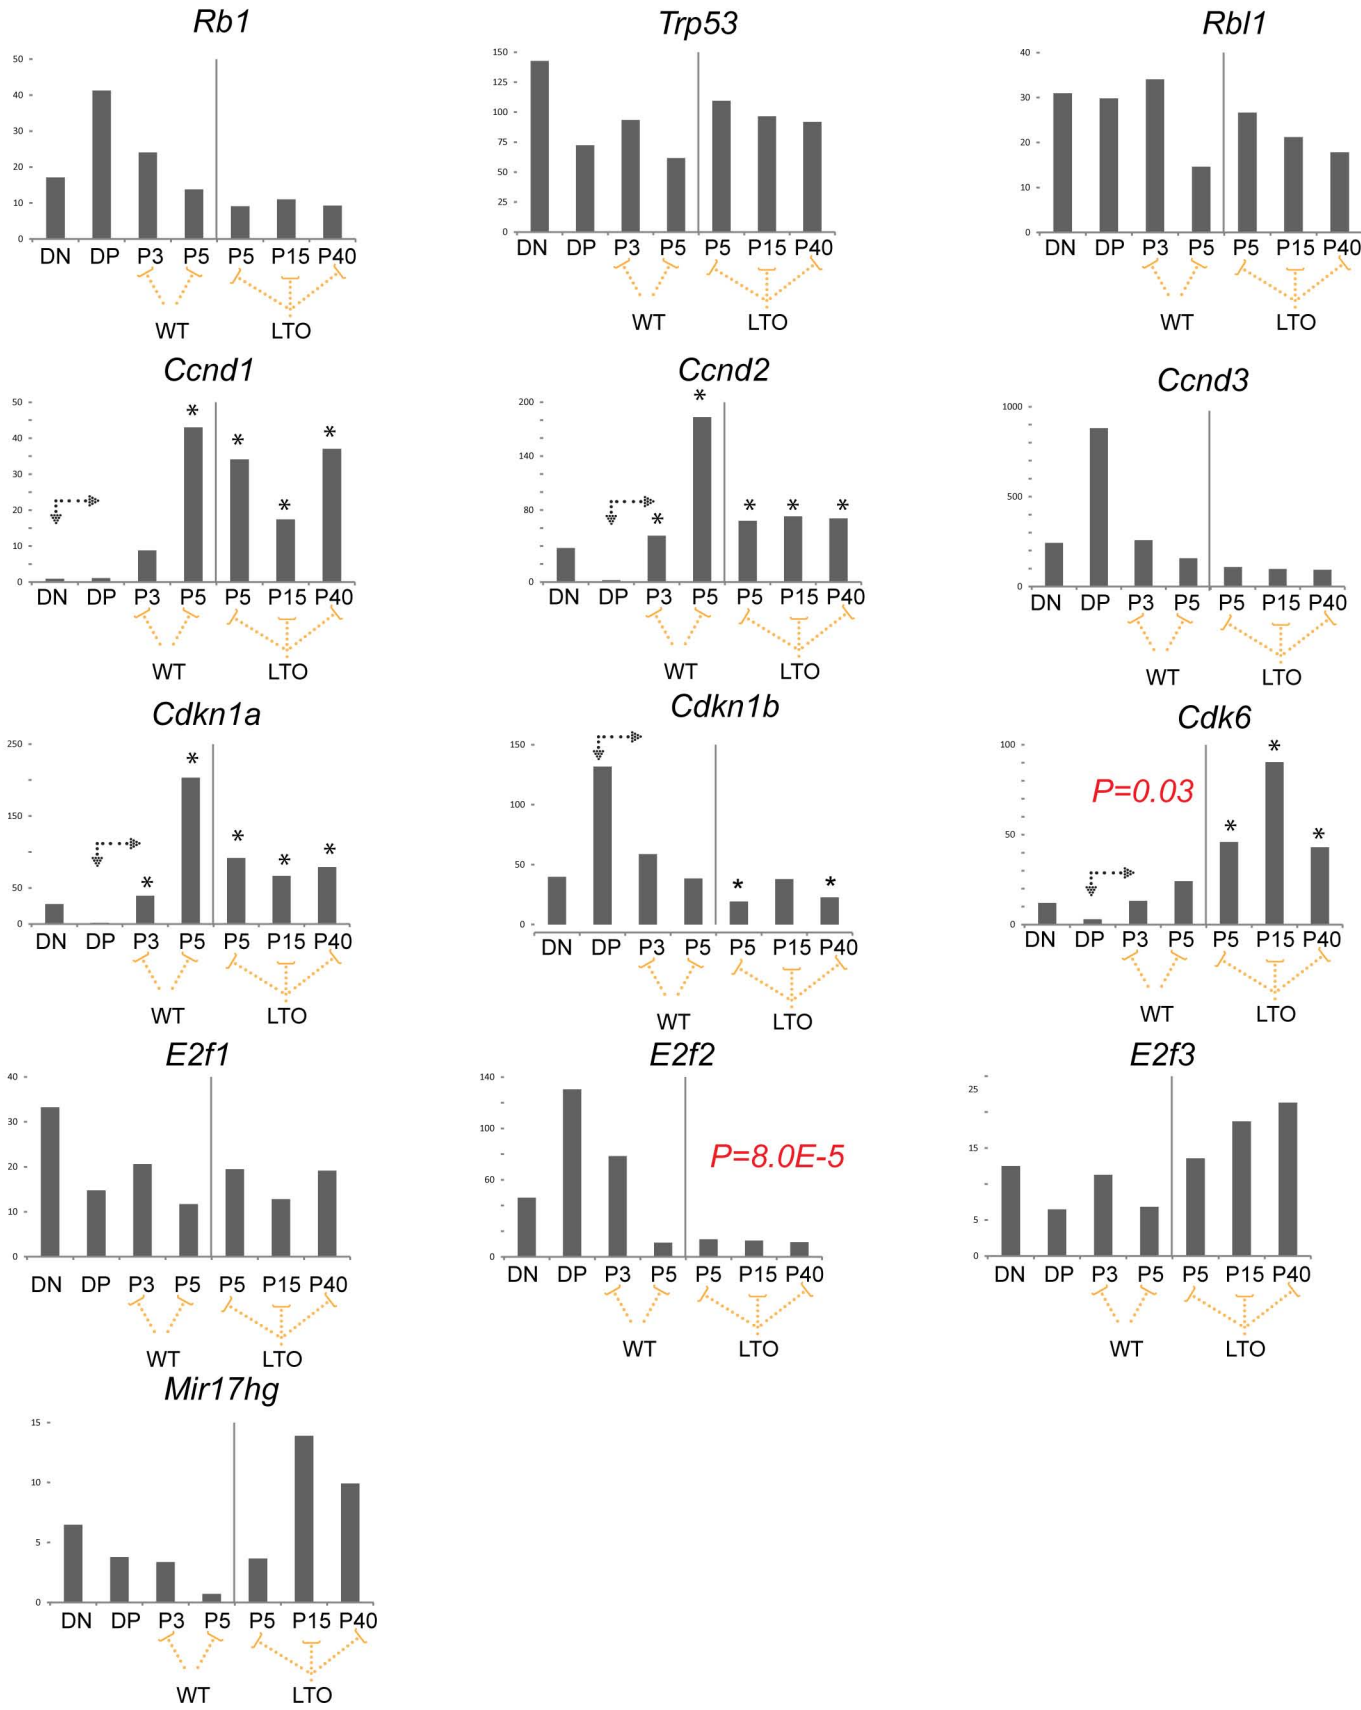

# Figure S3

## Cytokines and their receptors

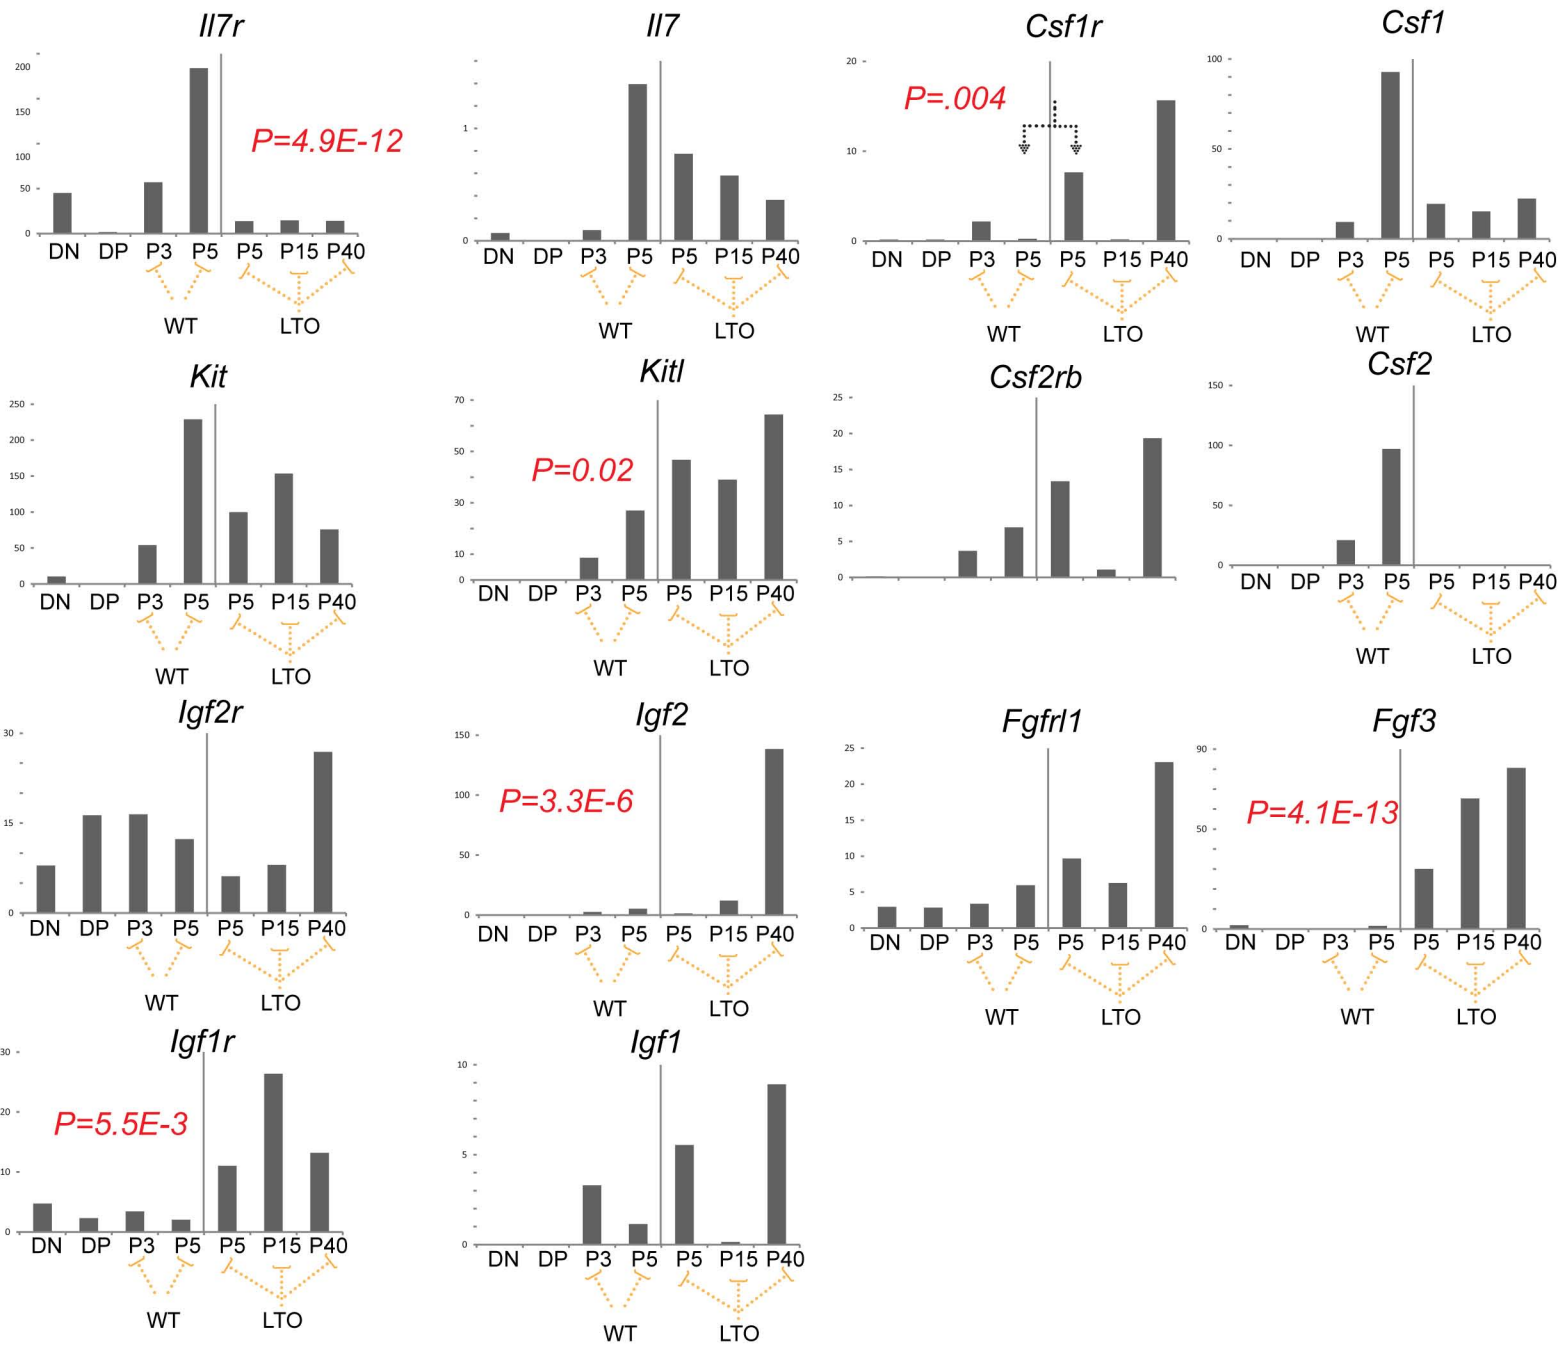

# Figure S4

## Apoptosis

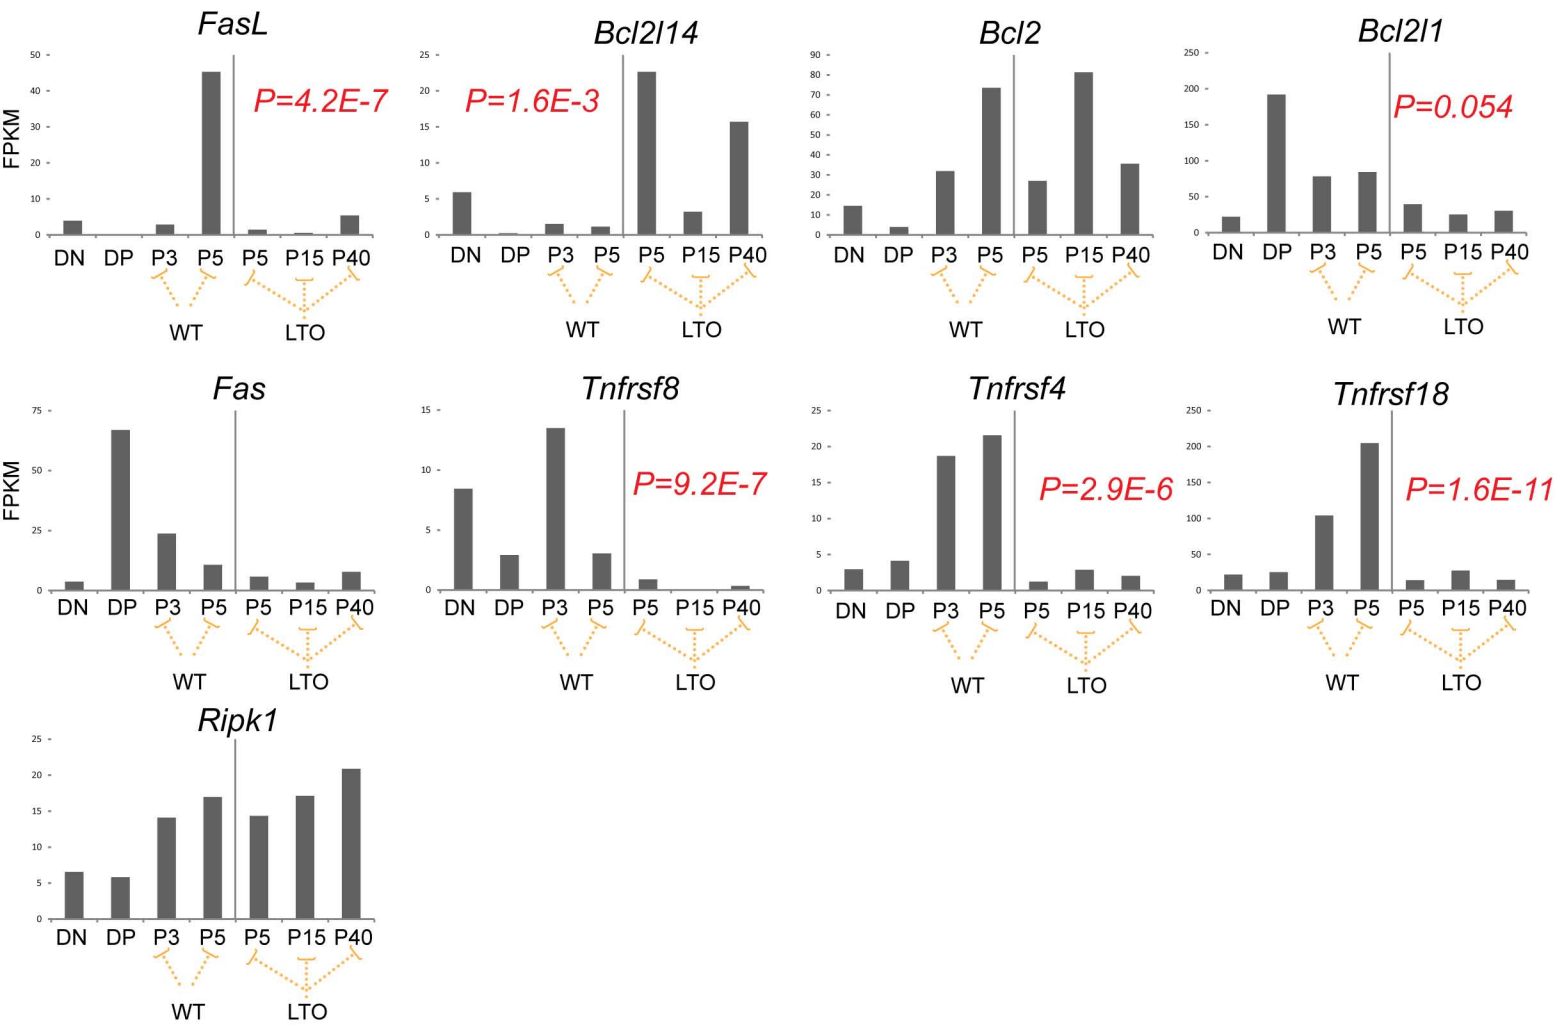

# Figure S5

## Ldb1<sup>lox/lox</sup>

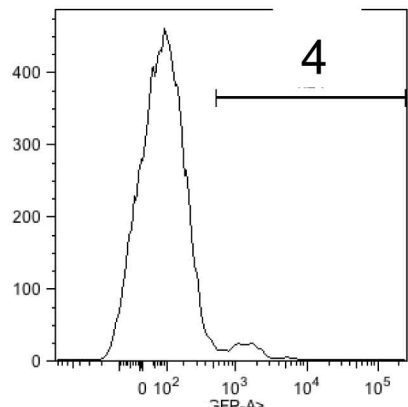

## MIG

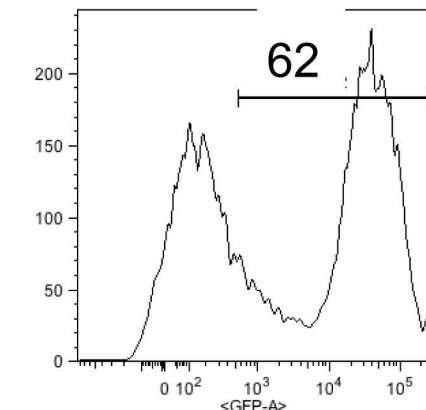

## MIG-Cre

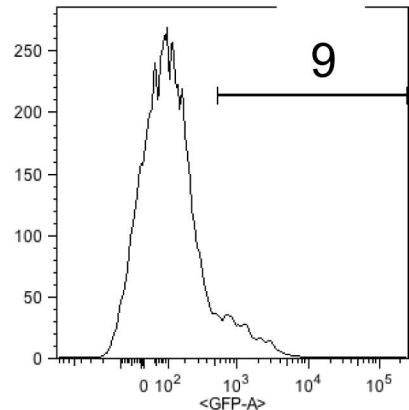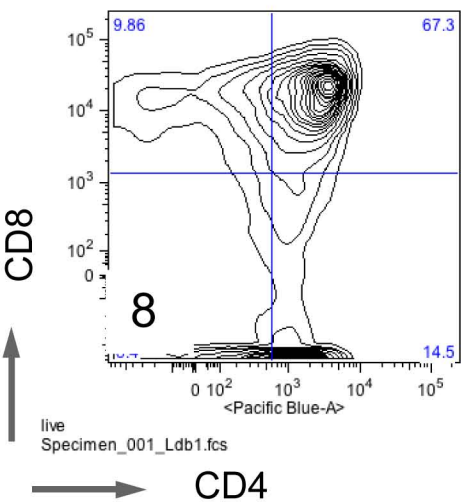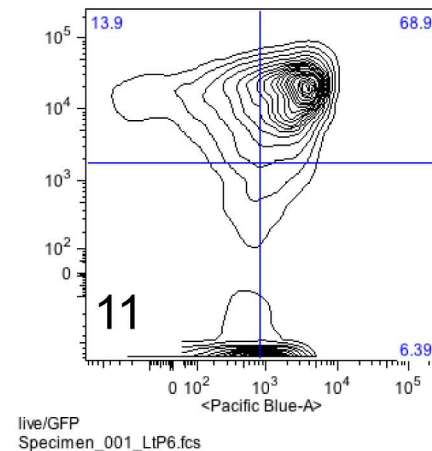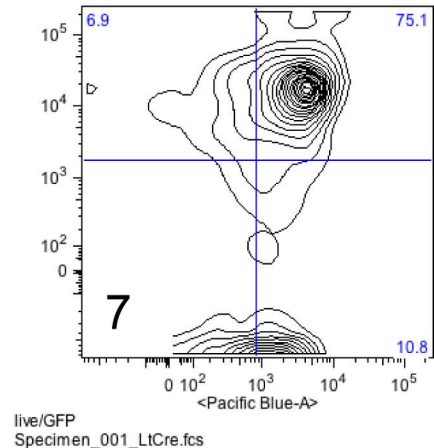

Supplement: NIHMS445437-supplement-Supp_Fig_S1-S5.pdf [file NIHMS445437-supplement-Supp_Fig_S1-S5.pdf]
